# Supplementary material for: Graft-versus-host disease reduces lymph node display of tissue-restricted self-antigens and promotes autoimmunity
Source: PubMed Central journal article supplement (PMC7108931; doi:10.1172/jci133102), 2020-03-09
Supplement: jci-130-133102-s008.pdf [file jci-130-133102-s008.pdf]

## Supplemental material

### Supplementary Figure 1

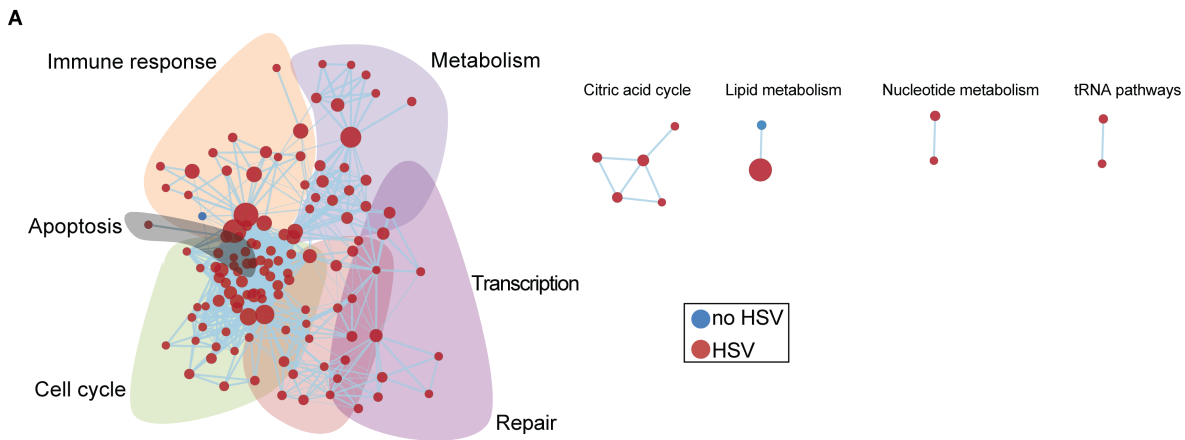

**Supplementary Figure 1. Network visualisation of differentially up-regulated REACTOME pathways in FRC from HSV-1 infected hosts using EnrichmentMap.**

**(A)** Enriched REACTOME pathways are depicted by red and blue nodes, where blue represents significant up-regulation in non-infected FRC and red represents significant up-regulation in HSV-1-infected FRC. Node size is proportional to the number of genes in each node, line thickness indicates the overlap of genes between nodes, and the theme of genes in each cluster is specified.

**Supplementary Figure 2. FRC depletion in HY-mismatched GVHD model according to donor T cell function and subset or to treatment.**

**(A)** Immunohistochemistry and confocal microscope analysis was performed on frozen LN sections taken from transplant recipients 7 days after BMT (i-iii, TCDBM; iv-vi, TCDBM+T). gp38 (podoplanin, red) and CD31 (green) was used to denote different LN stroma subsets. Scale bars = 100  $\mu$ m. **(B)** Absolute numbers and frequencies of LN FRC in recipients without acute GVHD (TCDBM) compared with recipients with acute GVHD that have either received TCDBM+ Mh CD8<sup>+</sup> T cells or TCDBM+ perforin-deficient (*pfp*<sup>-/-</sup>) Mh CD8<sup>+</sup> T cells at 3 weeks following F→M BMT (data derived from 6 independent experiments). **(C)** Absolute FRC numbers and frequencies 28 days after F→M BMT and 21 days following either Marilyn CD4<sup>+</sup> or MataHari CD8<sup>+</sup> T cell transfer (both transferred on day 7 post BMT). Controls received TCDBM alone (data derived from 3 independent experiments). **(D)** GVHD score of TCDBM, TCDBM+T and TCDBM+T recipients that received anti-CD8 $\alpha$  depleting antibody on days 5 and 19 post-transplant (left) and frequency of donor CD8 T cells in spleens of acute GVHD<sup>+</sup> recipients +/- anti-CD8 antibody (right). Data represent mean $\pm$ SEM. \* $p$ <0.05, \*\* $p$ <0.01, \*\*\* $p$ <0.001, Mann-Whitney U-test (2D, right), Kruskal-Wallis ANOVA (2B,C,D left).

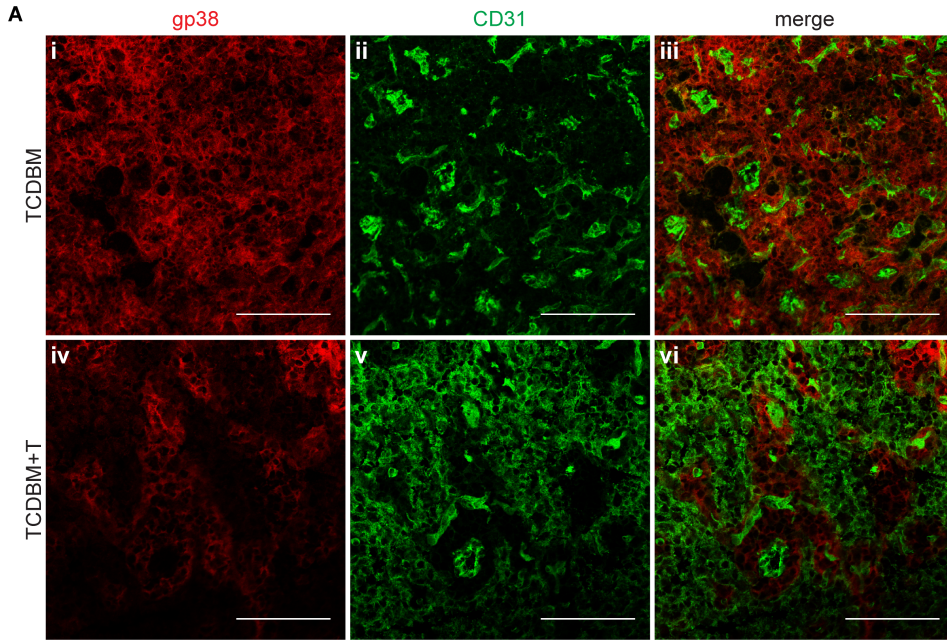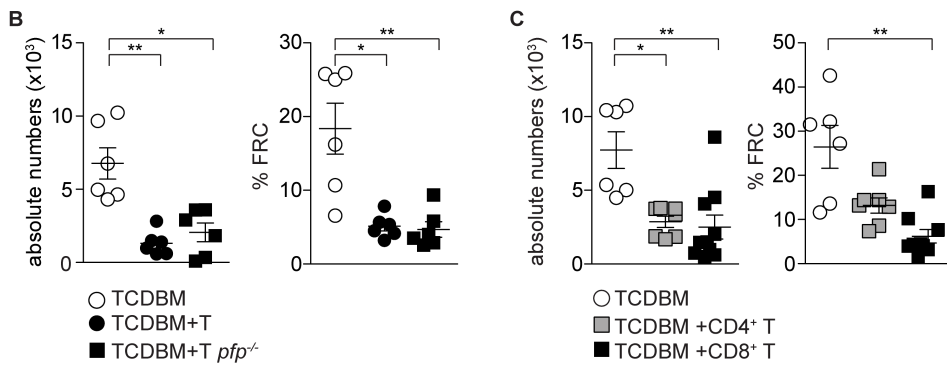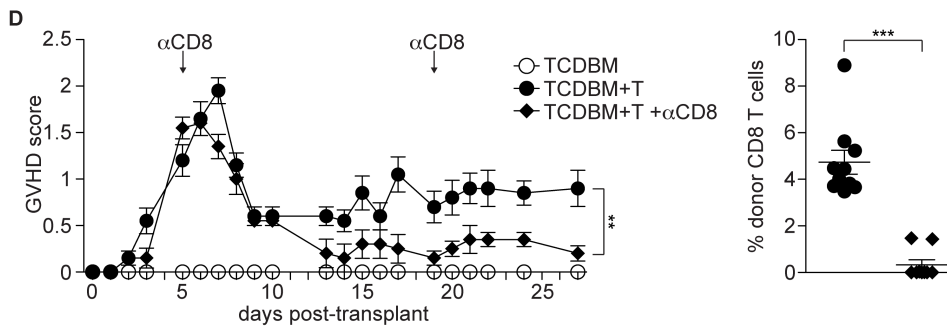

**Supplementary Figure 3. FRC depletion in multiple miHA-mismatched GVHD model according to donor T cell function and subset or to treatment.**

**(A)** Weight change in recipient mice after TCDBM, TCDBM+T or TCDBM+T<sub>CD62L-</sub> transfer is shown as percentage of initial body weight (=time point of transplant, data derived from 4 independent experiments). **(B)** GVHD score of TCDBM, TCDBM+T and TCDBM+T + post-transplant cyclophosphamide (PTCy) recipients (left) and frequencies of donor CD4 and CD8 T cells in spleens (right). PTCy was administered on days 3 and 4 post-transplant (25 mg/kg/day). **(C)** GVHD score (left) and survival curve (middle) of TCDBM and TCDBM+T with or without dexamethasone (Dex) treatment. Right: Percentage of donor T cells at 3 weeks after BMT in GVHD<sup>+</sup> mice that were either treated with Dex (0.3 mg/kg/day) or PBS starting at day 5 after BMT (data derived from 2 independent experiments). **(D)** Frequencies and absolute numbers of FRC in untransplanted mice that were either treated with Dex or PBS for 14 days before take-down. Data represent mean±SEM. \* $p < 0.05$ , \*\* $p < 0.01$ , \*\*\* $p < 0.001$ , Mann-Whitney U-test (3C right,D), Kruskal-Wallis ANOVA (3A,B,C).



Supplementary Figure 3

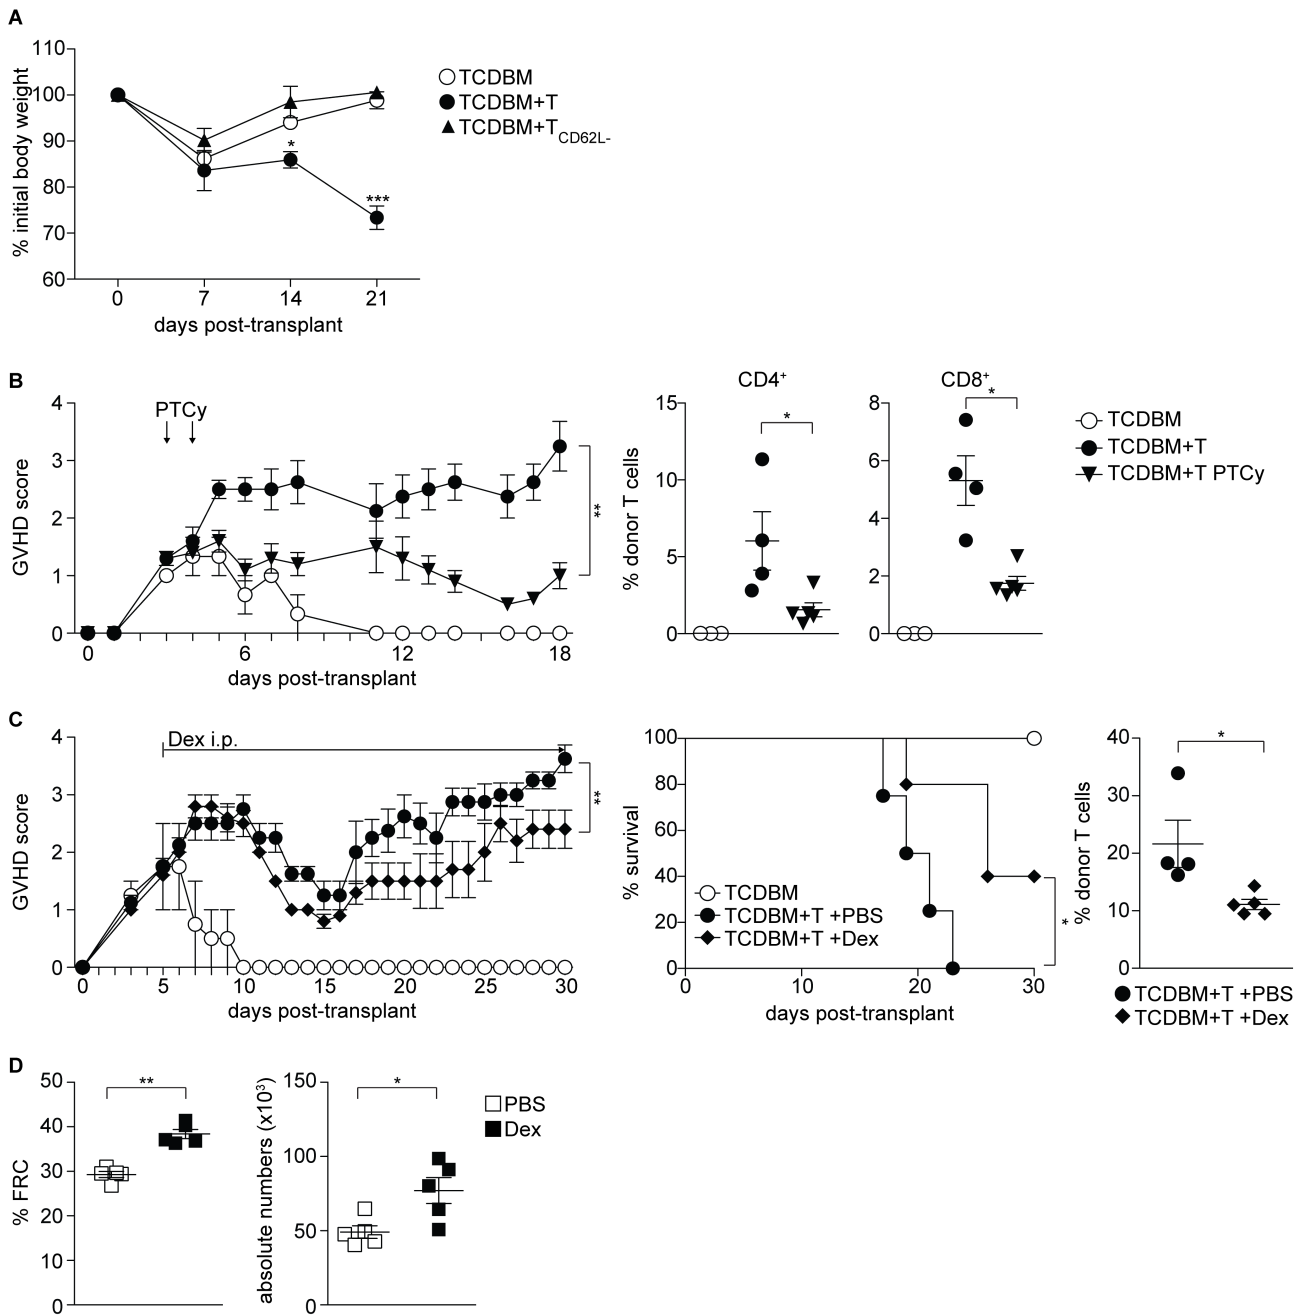

**Supplementary Figure 4. Stromal reorganisation following BMT.**

**(A)** Gating strategy used to identify  $\text{lin}^- \text{CD117}^+ \text{CD127}^+ \text{Ror}\gamma\text{t}^+$  LTi cells (top). Lineage markers: CD3, CD19, NK1.1, LY6G, F4/80. Representative flow cytometry plots depicting surface expression of CD4, NKp46 and CCR6 among  $\text{lin}^- \text{CD117}^+ \text{CD127}^+ \text{Ror}\gamma\text{t}^+$  cells (bottom). **(B)** Absolute numbers of host and donor LTi cells were evaluated at indicated time points following B6→129 BMT. Dotted line indicates mean absolute numbers of LTi cells in untreated mice (data derived from 3 independent experiments). **(C)** Surface expression of VCAM1 and ICAM1 on  $\text{CD45}^- \text{CD31}^- \text{gp38}^+$  LN stromal cells in un-transplanted controls (grey) and recipients of TCDBM alone (blue) or TCDBM+T (red) at indicated time points following B6→129 BMT. Summary data depicting MFI of VCAM1 among  $\text{CD45}^- \text{CD31}^- \text{gp38}^+$  population in TCDBM versus TCDBM+T recipients are shown below the respective flow cytometry plots (data derived from 6 independent experiments). Data represent mean±SEM. \* $p < 0.05$ , \*\* $p < 0.01$ , Mann-Whitney U-test.

Supplementary Figure 4

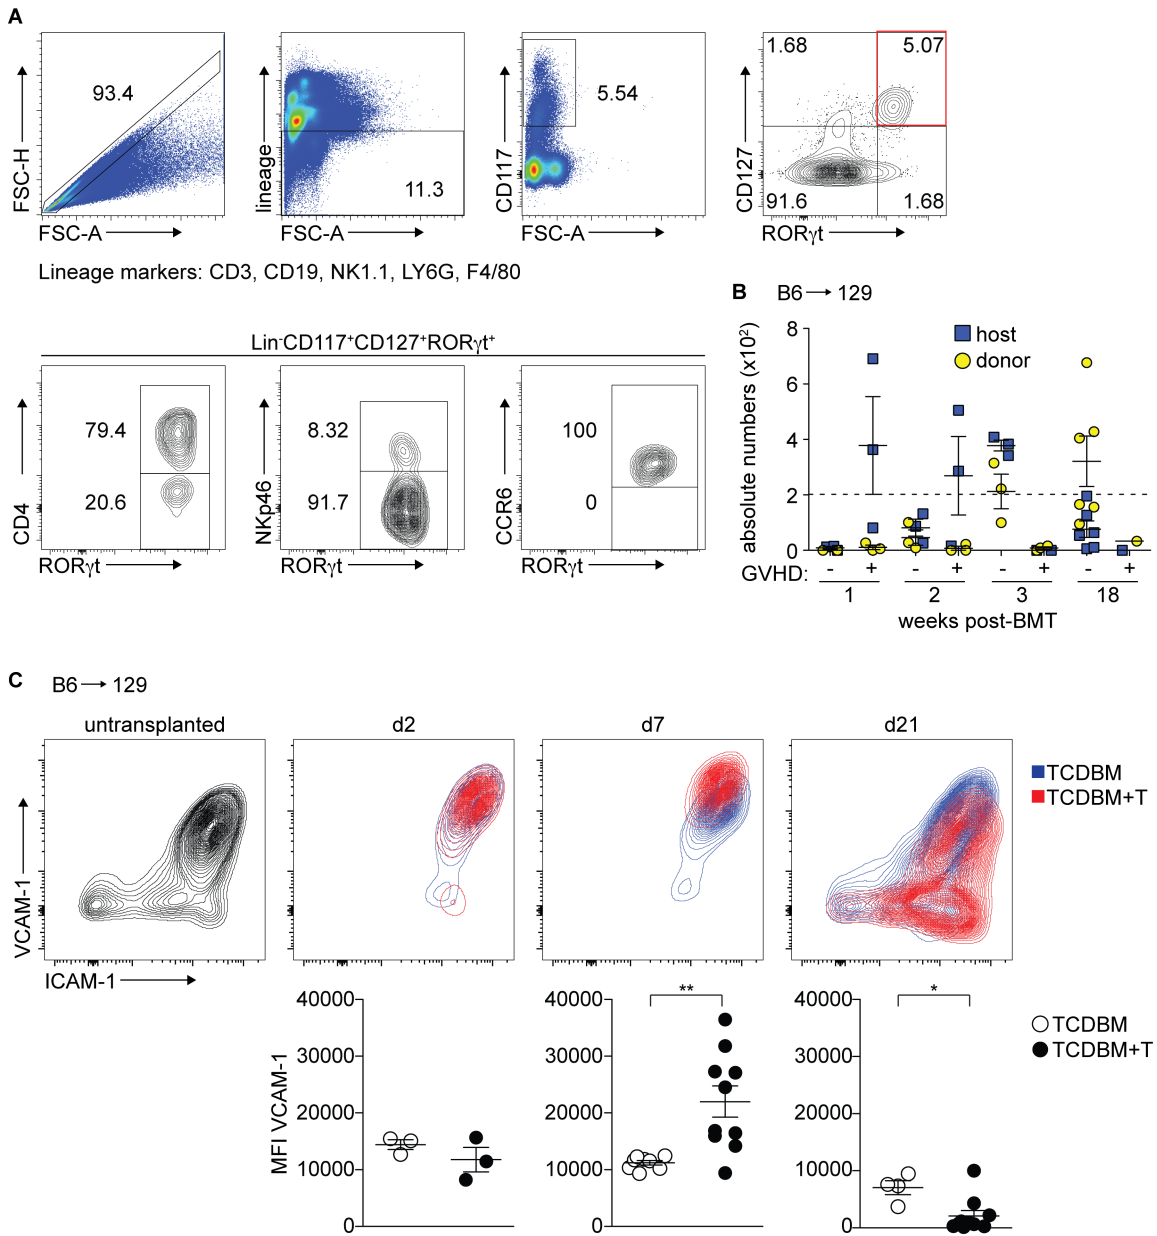

**Supplementary Figure 5. OT-I T cell responses following BMT in OVA-positive or -negative recipient mice.**

**(A)** Absolute FRC numbers (left) and OVA expression measured by qPCR (right) on day 14 after BMT in iFABPtOVA recipients with or without acute GVHD (data derived from 3 independent experiments). **(B)** Percentage and absolute numbers of OT-I T cells in LN in TCDBM and TCDBM+T iFABPtOVA recipients (left). Frequency and absolute numbers of IFN $\gamma$ <sup>+</sup> CD8<sup>+</sup>CD45.1<sup>+</sup> OT-I T cells in LN in absence and presence of acute GVHD is summarised (right) (data derived from 7-8 independent experiments) **(C)** Flow cytometry plots depict surface expression of CD45.1 and Thy1.1 among CD8<sup>+</sup> T cells (OT-I T cells- CD45.1<sup>+</sup>Thy1.1<sup>-</sup>; Mh T cells-CD45.1<sup>+</sup>Thy1.1<sup>+</sup>). Frequencies of OT-I T cells among total live cells in MLN and IEL isolated from OVA-negative B6 recipients with or without acute GVHD are summarised in dot plots (right panel) (data derived from 3 independent experiments). **(D)** Donor-derived DC were depleted by DT administration in hosts transplanted with CD11cDTR BM. Flow cytometry plots depict CD11b and CD11c surface expression among MHCII<sup>+</sup> splenocytes (data representative of 3 independent experiments). Data represent mean $\pm$ SEM. \* $p$ <0.05, \*\* $p$ <0.01, \*\*\* $p$ <0.001, Mann-Whitney U-test.

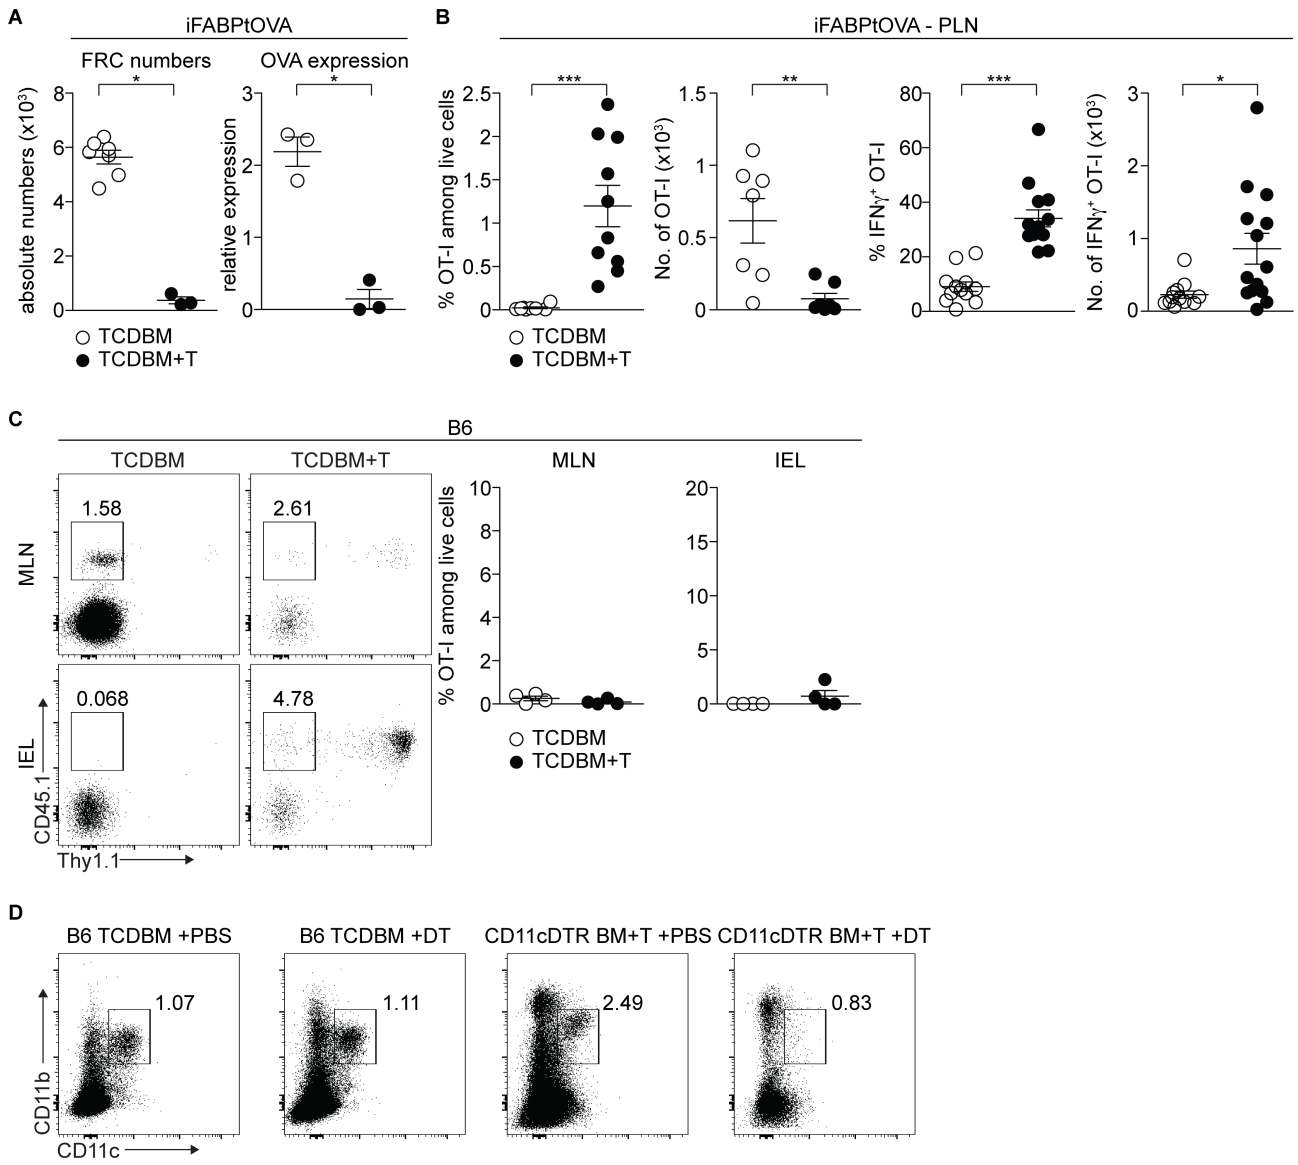

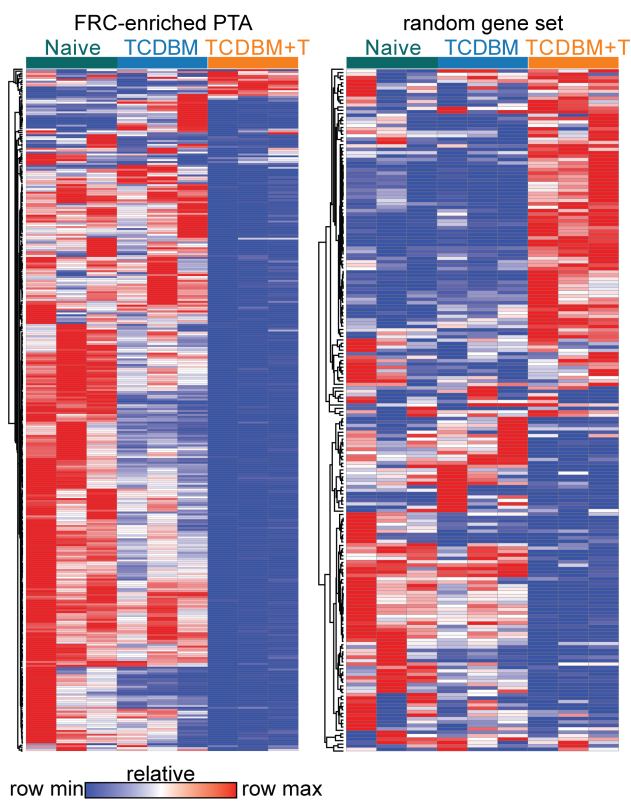

**Figure S6. Expression of FRC-enriched PTA and random gene set in acute GVHD.**

Relative expression of FRC-enriched PTA in FRC isolated from un-transplanted controls, TCDBM or TCDBM+T recipients at day 7 post-BMT following F→M BMT is shown as a heatmap (left panel). The expression values of a randomly selected gene set are depicted as a control (right panel).

**Supplementary Table 1: FRC-specific PTA**

| Gene Symbol   | log2(FC) FRC vs BEC | p-value FRC vs BEC | log2(FC) FRC vs LEC | p-value FRC vs LEC | log2(FC) TCDBM+T vs TCDBM | p-value     | FDR-adjusted p-value |
|---------------|---------------------|--------------------|---------------------|--------------------|---------------------------|-------------|----------------------|
| Mmp11         | 1.84185             | 3.22159E-05        | 1.38719825          | 0.000230797        | -7.28906                  | 1.2681E-12  | 7.71047E-11          |
| Art4          | 2.1008305           | 0.000267676        | 1.50371125          | 0.000816867        | -7.28086                  | 3.50405E-08 | 6.76994E-07          |
| Pamr1         | 5.5186775           | 6.25076E-08        | 5.75203175          | 1.8781E-08         | -7.02606                  | 8.88178E-16 | 1.2401E-13           |
| Crym          | 2.49718825          | 5.61225E-06        | 2.66882725          | 7.71745E-06        | -6.6937                   | 0.000374034 | 0.00225475           |
| Camk1g        | 1.382228            | 4.97257E-05        | 1.608473            | 7.09459E-05        | -6.57696                  | 0.00813865  | 0.030595             |
| St6galnac5    | 2.1887265           | 9.27986E-05        | 2.36828775          | 3.64275E-05        | -6.56159                  | 0.000436641 | 0.00257856           |
| Vsn1          | 3.02630925          | 0.000751317        | 3.13883925          | 0.000215383        | -6.49544                  | 0.00465497  | 0.0192053            |
| Rgma          | 1.66125775          | 2.02626E-05        | 1.3170015           | 0.000170366        | -6.23247                  | 0.00279953  | 0.0125057            |
| Itgbl1        | 1.64742             | 0.000273615        | 1.715825            | 0.000765575        | -6.18713                  | 1.50223E-06 | 1.84467E-05          |
| Saa3          | 1.9345155           | 0.041583926        | 2.197524            | 0.031256913        | -6.16906                  | 2.0528E-12  | 1.20404E-10          |
| Evc           | 2.47248975          | 5.29578E-07        | 1.64500725          | 7.91898E-06        | -5.72321                  | 1.6183E-07  | 2.59704E-06          |
| Fgf14         | 1.67367875          | 0.000770557        | 0.884191            | 0.006962998        | -5.67577                  | 0.0425627   | 0.118344             |
| Podn          | 2.88293925          | 4.91795E-07        | 2.885481            | 1.26127E-05        | -5.61286                  | 5.71395E-10 | 1.77222E-08          |
| Dpyd          | 3.600878001         | 0.000210771        | 0.03782325          | 0.460324632        | -5.56294                  | 1.15145E-07 | 1.93049E-06          |
| Sico2b1       | 0.313975            | 0.013692353        | 3.2271525           | 2.16853E-05        | -5.55669                  | 6.77236E-14 | 5.83859E-12          |
| Igj           | 1.958651            | 0.022747815        | 1.87876975          | 0.024749643        | -5.50231                  | 1.3942E-07  | 2.28697E-06          |
| Cyp2j9        | 1.162134            | 0.001186655        | 3.72638925          | 3.13335E-05        | -5.36583                  | 6.00132E-08 | 1.08816E-06          |
| Rbm46         | 1.59391925          | 0.000063143        | 1.69108825          | 0.000178997        | -5.29543                  | 0.00316797  | 0.0138898            |
| Fgfr4         | 1.58135225          | 0.000220556        | 2.078901            | 3.32734E-06        | -5.27094                  | 0.000664583 | 0.00368189           |
| Gpmb          | 3.24086425          | 0.000156385        | 2.5945905           | 0.000328837        | -5.25136                  | 0           | 0                    |
| Nfasc         | 2.13819275          | 1.47794E-06        | 2.217069            | 5.43405E-07        | -5.21531                  | 1.59662E-05 | 0.000147687          |
| Cd14          | 1.1376065           | 3.37599E-06        | 1.74100075          | 0.00352894         | -5.21216                  | 3.83061E-10 | 1.2597E-08           |
| Cpxm2         | 2.4118965           | 0.000319341        | 2.7325735           | 0.000447552        | -5.19499                  | 3.23162E-05 | 0.000271383          |
| Ugt3a2        | 2.50929325          | 0.000408713        | 2.662067            | 0.000400125        | -5.1789                   | 8.54957E-05 | 0.000629052          |
| Abca6         | 3.79270125          | 3.27161E-06        | 3.86140875          | 9.04326E-06        | -5.12023                  | 0.00495747  | 0.0202718            |
| Robo2         | 1.40744975          | 0.002517521        | 3.177628            | 6.51719E-06        | -5.09287                  | 9.20053E-07 | 1.19041E-05          |
| Npy1r         | 3.73892175          | 2.22148E-05        | 5.18335375          | 2.92896E-06        | -5.04969                  | 6.20491E-09 | 1.46613E-07          |
| Serpnb8       | 1.92330025          | 6.11961E-05        | 3.114065            | 1.53759E-06        | -5.04282                  | 0.000754057 | 0.00410411           |
| Il7           | 4.156331            | 2.91041E-05        | 1.51486425          | 0.000205698        | -4.98064                  | 7.43849E-14 | 6.2695E-12           |
| Dmc1          | 1.824749            | 2.12811E-05        | 1.843156            | 0.000185741        | -4.94834                  | 0.00700025  | 0.0270336            |
| 4833424O15Rik | 3.33865775          | 5.59151E-06        | 3.372567            | 0.000027723        | -4.94326                  | 0.00454931  | 0.0188483            |
| Agmo          | 2.03215025          | 2.16886E-05        | 3.1320005           | 7.43296E-05        | -4.94033                  | 7.71441E-08 | 1.36186E-06          |
| Col6a4        | 2.38850175          | 0.000012689        | 2.9007355           | 1.49526E-07        | -4.93516                  | 2.00136E-10 | 7.03325E-09          |
| Gxytl2        | 3.76147675          | 2.50362E-05        | -0.0856195          | 0.29762633         | -4.92243                  | 2.46585E-09 | 6.4923E-08           |
| Thbs2         | 4.634388            | 5.75431E-08        | 4.03174625          | 1.35441E-06        | -4.90627                  | 0           | 0                    |
| Cxcl2         | 0.9327085           | 0.006453658        | 2.09456825          | 0.000173574        | -4.87225                  | 2.15093E-10 | 7.48277E-09          |
| Cldn1         | 6.0734645           | 1.45575E-06        | 5.1591995           | 8.87838E-06        | -4.86372                  | 2.39456E-09 | 6.3285E-08           |
| Gli3          | 1.40055025          | 3.71653E-05        | 2.185985            | 4.04385E-06        | -4.85614                  | 2.01347E-05 | 0.000180023          |
| Cpeb1         | 2.74191475          | 1.24537E-07        | 2.575463            | 9.01876E-09        | -4.81848                  | 6.07364E-08 | 1.0998E-06           |
| Abca8b        | 2.460699            | 4.67628E-06        | 2.34007675          | 7.70216E-06        | -4.81462                  | 1.62141E-05 | 0.000149714          |
| Msc           | 3.10612125          | 1.77557E-06        | 2.3546705           | 7.28646E-06        | -4.80232                  | 2.06026E-11 | 9.52079E-10          |
| Zmynd15       | 3.30150125          | 9.86522E-06        | 1.44430025          | 0.000141963        | -4.79864                  | 0.000107424 | 0.000766328          |
| Lpar4         | 0.18116075          | 0.312741619        | 2.6506165           | 0.000677273        | -4.7736                   | 0.000746553 | 0.00406861           |
| Nos1ap        | 1.28565725          | 0.000457507        | 1.9206045           | 0.000333491        | -4.74044                  | 0.00548514  | 0.022049             |
| Kcnma1        | 3.06794775          | 1.02307E-07        | 3.234119            | 2.38828E-06        | -4.72081                  | 0.00024254  | 0.000211651          |
| Unc5c         | 2.92988975          | 5.51265E-07        | 0.997852            | 0.000237607        | -4.6889                   | 8.74212E-07 | 1.13785E-05          |
| Meox2         | 2.25810975          | 6.45555E-05        | 0.62732175          | 0.041327269        | -4.68619                  | 4.60159E-11 | 1.90438E-09          |
| Hs3st3a1      | 3.60736475          | 0.000139237        | 1.617592            | 0.001377748        | -4.67732                  | 6.47915E-07 | 8.72895E-06          |
| Larp6         | 3.045898            | 7.75348E-07        | 2.8497945           | 1.6811E-06         | -4.67618                  | 2.00885E-08 | 4.13825E-07          |
| Clip3         | 4.08589975          | 5.01894E-07        | 3.52410075          | 1.99813E-06        | -4.66833                  | 2.34917E-11 | 1.06001E-09          |
| Ctsk          | 4.643297            | 1.80307E-08        | 2.26049675          | 7.44795E-06        | -4.61501                  | 1.32547E-11 | 6.41362E-10          |
| Adamts15      | 1.505902            | 0.000010499        | 1.88613075          | 2.43321E-06        | -4.61341                  | 2.32703E-13 | 1.70189E-11          |
| Apoc1         | 2.28237375          | 0.000419161        | 2.18998875          | 0.000837434        | -4.60875                  | 0.000045565 | 0.000364978          |
| Fmo2          | -0.68478475         | 0.042077468        | 2.8248135           | 0.000723809        | -4.58534                  | 2.87168E-09 | 7.42411E-08          |
| Orm2          | 1.68387375          | 0.000987842        | 1.88234775          | 0.000978318        | -4.56594                  | 0.000869149 | 0.00463859           |
| Irs3          | 1.29667625          | 0.0001148          | 1.6325815           | 4.31841E-06        | -4.56031                  | 0.000305818 | 0.00189789           |
| Thbs4         | 1.85708425          | 0.010969793        | 1.11472775          | 0.041480836        | -4.55506                  | 6.98478E-06 | 7.14467E-05          |
| Rtn2          | 1.97337075          | 3.52507E-05        | 1.72778775          | 0.00019707         | -4.53236                  | 0.0491244   | 0.132156             |
| Tbx15         | 4.41863325          | 5.68999E-07        | 4.66030675          | 4.29281E-08        | -4.52799                  | 1.02758E-08 | 2.28358E-07          |
| Il34          | 1.402583            | 0.000235728        | 2.40861975          | 1.37985E-05        | -4.52642                  | 0.000229764 | 0.00148733           |
| Nr1d1         | 0.16633825          | 0.35024344         | 1.5886605           | 0.008107445        | -4.51466                  | 1.40288E-12 | 8.49263E-11          |
| Csmd1         | 3.24343375          | 1.6223E-08         | 3.829135            | 2.32325E-09        | -4.50632                  | 4.71471E-07 | 6.62072E-06          |
| Vwa1          | -1.360478           | 0.000044177        | 2.25088825          | 5.50663E-06        | -4.48716                  | 1.69861E-10 | 6.07747E-09          |
| Olfml1        | 4.22141875          | 3.12581E-06        | 4.34878975          | 7.4898E-07         | -4.46228                  | 1.27159E-09 | 3.60918E-08          |
| Plekhh2       | 3.94928825          | 1.82036E-06        | 4.122882            | 6.02776E-05        | -4.44137                  | 2.29916E-08 | 4.65054E-07          |
| Cyp2d22       | -0.660909501        | 0.002547729        | 1.953035            | 9.38492E-06        | -4.42319                  | 2.61484E-09 | 6.84114E-08          |
| Scn7a         | 5.702059            | 0.000034461        | 5.89185425          | 1.10789E-05        | -4.41734                  | 1.7748E-12  | 1.0548E-10           |
| Lrrc4c        | 1.372211            | 0.000213348        | 1.684747            | 8.63568E-05        | -4.41452                  | 0.000628178 | 0.00350879           |
| Colec12       | 3.50309775          | 1.46712E-07        | 0.99443625          | 0.000373213        | -4.40289                  | 1.11022E-15 | 1.49963E-13          |
| 9930013L23Rik | 1.9970545           | 1.81674E-06        | 1.9762295           | 3.26587E-06        | -4.37029                  | 0.00126954  | 0.00642017           |
| Ccdc3         | 2.121856            | 1.83039E-05        | -0.668768501        | 0.015851238        | -4.36966                  | 7.51904E-07 | 9.98078E-06          |
| Adcyap1r1     | 4.2882315           | 2.04295E-08        | 4.770883            | 1.58351E-09        | -4.36356                  | 3.27081E-11 | 1.40991E-09          |
| Kcnq4         | 1.871557            | 7.39106E-07        | 2.38600575          | 3.14795E-07        | -4.35728                  | 0.00062502  | 0.00349304           |
| Gabrg3        | 2.12280875          | 7.88896E-05        | 2.1617825           | 9.15387E-05        | -4.35509                  | 0.00633976  | 0.0249215            |
| Mrc2          | 3.179531            | 2.02664E-07        | 3.47328275          | 6.62292E-07        | -4.35478                  | 4.02987E-10 | 1.31687E-08          |
| Slc36a2       | 3.5121505           | 2.52809E-05        | 3.67185725          | 3.37979E-05        | -4.34336                  | 3.41624E-09 | 8.63809E-08          |
| Grem1         | 4.92369225          | 1.11589E-05        | 5.053156            | 1.00931E-06        | -4.31278                  | 4.41043E-09 | 1.0867E-07           |
| Mustn1        | 1.57647725          | 0.001897466        | 2.32823875          | 0.000137232        | -4.31135                  | 1.76836E-11 | 8.3047E-10           |
| Svep1         | 5.346474            | 2.71778E-08        | 5.41056925          | 8.2548E-08         | -4.30843                  | 3.93979E-10 | 1.29337E-08          |
| Cc2d2a        | 1.72070225          | 2.56355E-05        | 1.362745            | 7.89055E-05        | -4.2847                   | 3.68648E-06 | 4.07439E-05          |
| Ffra2         | 4.34841975          | 1.34642E-07        | 3.599204            | 5.61544E-08        | -4.28143                  | 1.3753E-08  | 0.00000296           |
| Tbx18         | 3.1784455           | 1.51121E-07        | 3.43902975          | 3.12981E-07        | -4.25348                  | 0.00020865  | 0.00136925           |
| Gli2          | 2.027148            | 1.94545E-06        | 2.1134375           | 4.36013E-06        | -4.23471                  | 3.63711E-05 | 0.000300386          |
| Myo16         | 3.165056            | 3.76156E-08        | 2.905914            | 5.51465E-06        | -4.22454                  | 0.000725512 | 0.00397011           |
| Hmgcs2        | 3.12090775          | 0.000326426        | 5.895215            | 1.84152E-09        | -4.20335                  | 3.10418E-13 | 2.21176E-11          |

|               |              |             |              |             |          |             |             |
|---------------|--------------|-------------|--------------|-------------|----------|-------------|-------------|
| Akr1c19       | 2.03707375   | 0.001316908 | 2.19986225   | 0.00136103  | -4.20108 | 0.00811414  | 0.030527    |
| Wdr86         | 2.62416525   | 0.000011395 | 2.78560675   | 7.4338E-06  | -4.19562 | 8.25939E-06 | 8.2669E-05  |
| Adamts20      | 2.06238925   | 8.36913E-05 | 2.212804     | 2.67549E-05 | -4.18165 | 0.00311873  | 0.0137057   |
| Slc7a11       | 4.6073055    | 1.14947E-05 | 3.80946275   | 2.19531E-05 | -4.15989 | 1.58793E-09 | 4.37975E-08 |
| Synpo2        | 2.33311925   | 6.17752E-05 | 3.40189575   | 8.1167E-08  | -4.15581 | 2.0301E-10  | 7.12746E-09 |
| Abcd2         | 2.311563     | 0.000048184 | 0.925019     | 0.004004879 | -4.15566 | 1.05587E-07 | 1.78859E-06 |
| Ntng1         | 1.967852     | 0.000947016 | 2.07470225   | 0.001206819 | -4.14411 | 0.206727    | 0.396554    |
| Avpr1a        | 2.69777525   | 5.53088E-06 | 2.37303425   | 2.17837E-06 | -4.1402  | 4.36314E-06 | 4.71051E-05 |
| Cacna1c       | 2.24243725   | 6.95405E-07 | 2.437894     | 3.05792E-08 | -4.13109 | 0.0345573   | 0.100284    |
| Rai2          | 2.13624275   | 1.31697E-06 | 2.0488775    | 1.38694E-06 | -4.11786 | 0.000144743 | 0.000995557 |
| Stc2          | 1.71557125   | 0.000330317 | 0.13961775   | 0.273017466 | -4.08919 | 0.00398127  | 0.0168671   |
| Dsc3          | 7.049988     | 5.70968E-09 | 6.29068325   | 1.15805E-05 | -4.0865  | 4.35385E-12 | 2.35217E-10 |
| Pla2r1        | 2.3374115    | 2.73083E-05 | 1.668364     | 0.000284466 | -4.07209 | 1.96256E-08 | 4.05329E-07 |
| Pappa         | 1.645558     | 0.001129985 | 1.61474175   | 0.000821637 | -4.03721 | 0.000251061 | 0.00160219  |
| Pfce1         | 2.579545     | 1.16752E-06 | -0.037293499 | 0.386640996 | -4.02356 | 4.64863E-05 | 0.000371639 |
| Plscr2        | -2.249755503 | 8.70611E-05 | 2.48626075   | 1.73628E-05 | -4.02236 | 2.49855E-05 | 0.000217029 |
| Rasl12        | 2.40041175   | 1.54632E-05 | 3.44877425   | 5.26709E-06 | -4.01639 | 7.63302E-06 | 7.72957E-05 |
| Mxra7         | 1.3520315    | 3.44476E-05 | 2.17847525   | 7.10863E-06 | -3.98493 | 1.81665E-09 | 4.94309E-08 |
| Sec16b        | 1.89812175   | 2.01741E-05 | 1.655873     | 1.23114E-05 | -3.98013 | 0.000686676 | 0.00378709  |
| Sulf1         | 3.172752     | 0.010032462 | 1.853816     | 0.000266461 | -3.96802 | 1.26736E-10 | 4.70922E-09 |
| Kazn          | 1.59183925   | 2.25704E-05 | 2.32571      | 2.50882E-06 | -3.95923 | 2.60729E-05 | 0.000225248 |
| Adamts1       | 1.7581915    | 0.000358321 | 0.73338225   | 0.008836849 | -3.9584  | 3.57321E-05 | 0.000295815 |
| Tmeff2        | 2.04102365   | 0.000504546 | 2.39688475   | 0.000185833 | -3.95544 | 2.8751E-08  | 5.67465E-07 |
| Ggt5          | 1.990379     | 2.11896E-05 | 3.729564     | 4.77168E-07 | -3.94094 | 5.17275E-12 | 2.75005E-10 |
| Pcdh19        | 0.28713075   | 0.1146819   | 2.361914     | 1.56197E-05 | -3.92995 | 0.0183237   | 0.0598777   |
| Pcdh15        | 4.296555     | 1.45051E-06 | 2.504662     | 0.002921309 | -3.92722 | 0.000451353 | 0.00265252  |
| Mrv1          | 2.32895775   | 2.45627E-05 | 2.936768     | 2.92231E-07 | -3.91835 | 4.79061E-07 | 6.71592E-06 |
| Ccdc8         | 2.01322125   | 1.01577E-06 | 2.10502975   | 9.78324E-05 | -3.90096 | 0.000635683 | 0.003544    |
| Vtn           | 5.5303665    | 1.54892E-05 | 6.38482075   | 1.63848E-05 | -3.88303 | 3.17746E-13 | 2.24468E-11 |
| Al464131      | 1.9054015    | 7.9391E-06  | 2.080264     | 4.66122E-05 | -3.87373 | 1.94669E-06 | 2.32616E-05 |
| Dtx4          | 3.707797     | 1.11341E-07 | 4.21372425   | 4.75219E-06 | -3.86348 | 1.02363E-13 | 8.24227E-12 |
| Prr16         | 2.23866275   | 2.72349E-06 | 1.292045     | 0.000143879 | -3.86023 | 2.78952E-07 | 4.16549E-06 |
| Pth1r         | 1.60848225   | 0.000290199 | 1.6946835    | 7.13437E-05 | -3.85751 | 3.35265E-06 | 3.74536E-05 |
| Nxph1         | -0.59237     | 0.070428561 | 1.649701     | 0.000318882 | -3.84323 | 0.000781575 | 0.00423388  |
| Pcdh18        | 2.3835185    | 5.60526E-06 | 3.20861575   | 8.36962E-07 | -3.83563 | 4.19163E-05 | 0.000339622 |
| Gprasp2       | 2.37156625   | 2.43343E-06 | 1.5471375    | 3.65188E-05 | -3.82752 | 0.0133427   | 0.0459623   |
| Gpc6          | 4.39239825   | 7.88257E-09 | 4.31571975   | 5.2175E-07  | -3.78435 | 6.3224E-09  | 1.48964E-07 |
| Cpz           | 3.349586001  | 1.74882E-05 | 3.414561     | 4.21965E-07 | -3.7766  | 0.000301312 | 0.00187357  |
| Lphn3         | 2.006604     | 4.26865E-06 | 0.86991675   | 0.000430284 | -3.76544 | 0.00165722  | 0.00803102  |
| Atp1b2        | 1.58366175   | 4.89832E-05 | 2.44063275   | 2.20967E-06 | -3.75584 | 2.52535E-06 | 2.93091E-05 |
| Serpine1      | 2.87904375   | 0.000344525 | 0.48693425   | 0.181382485 | -3.75184 | 0.00512875  | 0.0208557   |
| Rnf150        | 3.14709425   | 1.48989E-06 | 3.13757075   | 8.78971E-06 | -3.73188 | 6.78434E-07 | 9.09874E-06 |
| Stmn2         | 3.1727575    | 9.53286E-06 | 4.76697825   | 7.22095E-07 | -3.72809 | 7.29033E-09 | 1.68233E-07 |
| Cml3          | 2.58612775   | 8.74395E-05 | 2.702029     | 0.000052103 | -3.72319 | 0.000862387 | 0.00460784  |
| Ngfr          | 2.35628675   | 0.000507184 | 1.64934375   | 0.000844794 | -3.72213 | 0.00208076  | 0.00972662  |
| Pthlh         | 2.4117465    | 2.61018E-06 | 1.3065975    | 0.000106844 | -3.71793 | 1.89164E-05 | 0.000170675 |
| Fap           | 4.59964375   | 3.59605E-07 | 4.8431225    | 1.29066E-07 | -3.70571 | 4.04763E-08 | 7.65726E-07 |
| Mark1         | 2.2464035    | 2.38452E-07 | 2.75927325   | 3.87224E-08 | -3.69447 | 2.73359E-07 | 4.09357E-06 |
| Gpr176        | 3.94736125   | 1.55848E-08 | 4.109118     | 5.12569E-07 | -3.68314 | 9.41465E-09 | 2.11373E-07 |
| Bst1          | 2.197856     | 4.91053E-05 | 2.13532625   | 5.07493E-05 | -3.6793  | 1.50584E-10 | 5.47274E-09 |
| 5430435G22Rik | 3.173897     | 9.58061E-06 | 3.3057765    | 1.18851E-05 | -3.67742 | 5.24842E-06 | 5.55775E-05 |
| Tmem35        | 2.013254     | 0.000283591 | 2.2964815    | 8.91159E-05 | -3.67488 | 0.0150921   | 0.0509933   |
| Rab30         | 3.09652425   | 2.95049E-06 | 1.72382875   | 7.48163E-05 | -3.6742  | 0.000904674 | 0.00480039  |
| Aspn          | 1.79782675   | 0.000168159 | 3.29217875   | 1.30897E-06 | -3.66859 | 0.0245295   | 0.0758474   |
| Hgf           | 4.16431775   | 8.35209E-06 | 3.98039525   | 4.34403E-05 | -3.6582  | 7.38679E-06 | 0.000075059 |
| Spib          | 4.03587      | 1.29426E-07 | 0.93722375   | 0.001895934 | -3.63644 | 3.04829E-11 | 1.32641E-09 |
| Srxp2         | 3.899632     | 3.75847E-08 | 4.12494975   | 1.27425E-09 | -3.63359 | 0.00011536  | 0.000816062 |
| C1qtnf7       | 3.07435025   | 7.46408E-09 | -1.22837425  | 0.00606031  | -3.62126 | 0.000421991 | 0.00250381  |
| Adm           | 1.8112765    | 0.000447722 | 0.47633725   | 0.060151063 | -3.60416 | 1.91611E-06 | 2.29342E-05 |
| Sned1         | 2.08030775   | 0.000539725 | 0.895596     | 0.007721556 | -3.59625 | 3.10638E-10 | 1.04051E-08 |
| Mmp3          | 5.79451325   | 1.78218E-05 | 5.90742425   | 1.21424E-05 | -3.59061 | 7.73936E-09 | 1.77902E-07 |
| Nkd1          | 2.710583     | 2.90791E-05 | 2.330552     | 1.38994E-06 | -3.58345 | 2.36555E-06 | 2.76869E-05 |
| Ildr2         | 3.022163     | 2.1865E-07  | 3.2093945    | 1.22396E-05 | -3.5695  | 5.35341E-09 | 1.29217E-07 |
| Slc43a1       | 2.537693     | 9.1811E-06  | 2.21279825   | 0.000019745 | -3.56011 | 8.11049E-07 | 1.06736E-05 |
| Cpxm1         | 6.444203     | 3.85617E-07 | 3.60971875   | 2.21808E-05 | -3.55816 | 1.30318E-05 | 0.000123747 |
| Lhx8          | 3.44883      | 2.38235E-06 | 3.568181251  | 4.26126E-05 | -3.55232 | 2.20376E-08 | 4.48308E-07 |
| Rhbdl3        | 1.9594525    | 1.59382E-06 | 1.838534     | 8.13503E-06 | -3.55102 | 3.04396E-07 | 4.50007E-06 |
| Msx1          | 1.1099345    | 2.63111E-05 | 2.65929775   | 1.04789E-07 | -3.5369  | 0.0337168   | 0.0983033   |
| Ptgs2         | 4.5643965    | 0.000038264 | 3.400832     | 8.63191E-05 | -3.53369 | 1.08886E-09 | 3.14654E-08 |
| Tusc5         | 2.116556     | 0.000270389 | 2.95026125   | 3.02084E-06 | -3.53343 | 0.00125736  | 0.00637098  |
| Sh3pxd2b      | 3.04149875   | 1.99895E-08 | 2.68885775   | 4.47934E-05 | -3.53276 | 3.53655E-06 | 3.92646E-05 |
| Mmp19         | 3.5478025    | 6.2944E-07  | 3.59549475   | 3.72969E-07 | -3.52334 | 1.20317E-06 | 1.51466E-05 |
| Tnfrsf13b     | 5.15154475   | 2.55331E-08 | 5.0477925    | 2.02566E-07 | -3.50333 | 4.47367E-10 | 1.44145E-08 |
| Ntrk1         | 3.516506999  | 7.35775E-06 | 3.335945501  | 2.94476E-06 | -3.50264 | 4.5862E-11  | 1.8999E-09  |
| Kcnj8         | 3.196571     | 0.000010212 | 2.7150795    | 1.04202E-05 | -3.47881 | 2.51887E-09 | 6.61509E-08 |
| Nbl1          | 2.1684805    | 0.000377222 | 2.63735875   | 5.33062E-05 | -3.47191 | 1.69354E-08 | 3.54864E-07 |
| Adamts3       | 2.25209675   | 4.7772E-06  | 2.027163     | 2.34247E-05 | -3.46673 | 8.92383E-05 | 0.000653112 |
| Arntl2        | 1.33273475   | 4.84465E-05 | 1.72836475   | 0.000254171 | -3.46406 | 0.00053218  | 0.00305488  |
| Serpina3c     | 2.83309675   | 2.72731E-06 | 3.2988675    | 4.02492E-05 | -3.45148 | 5.12489E-08 | 9.46632E-07 |
| Rtn1          | 3.53522275   | 2.78259E-07 | 3.16935675   | 5.38242E-07 | -3.44833 | 0.000351843 | 0.00214217  |
| Arhgap20      | 2.019923     | 5.39143E-05 | 2.82198      | 6.25325E-05 | -3.44575 | 0.000590582 | 0.00333473  |
| Pde1a         | 1.9759305    | 1.20759E-05 | 2.3181645    | 4.71098E-05 | -3.43962 | 0.00300739  | 0.0132897   |
| Adc           | 2.74120875   | 9.74494E-06 | 1.69648275   | 1.24737E-05 | -3.42813 | 4.6762E-07  | 6.57777E-06 |
| Gucy1b3       | 1.8206695    | 0.001269398 | 1.72428575   | 0.000360212 | -3.42361 | 0.000131045 | 0.000913764 |
| Anpep         | 2.70584375   | 3.90227E-05 | -0.1624975   | 0.241481927 | -3.41743 | 2.91109E-06 | 3.32188E-05 |
| Gm266         | 1.7908485    | 7.91551E-06 | 1.9291805    | 2.42647E-06 | -3.41623 | 0.0216671   | 0.0686816   |
| Tspan11       | 1.7365595    | 4.46519E-05 | 0.7154325    | 0.002468466 | -3.40851 | 0.000138961 | 0.000960405 |
| Cacng7        | 2.471427     | 6.38843E-07 | 2.73306775   | 2.4156E-07  | -3.40744 | 0.303277    | 1           |



|           |              |             |              |             |          |             |             |
|-----------|--------------|-------------|--------------|-------------|----------|-------------|-------------|
| Naalad2   | 4.41197975   | 2.68605E-08 | 4.86495875   | 2.85743E-07 | -3.39678 | 1.00893E-07 | 1.71962E-06 |
| Gstm7     | 1.17175925   | 0.000531939 | 1.64242625   | 0.000256523 | -3.39391 | 0.00368271  | 0.015791    |
| BC005764  | 2.080852     | 0.000349784 | 2.3525865    | 7.99592E-05 | -3.39098 | 0.920126    | 0.97244     |
| Cyp7b1    | 1.70225625   | 9.81819E-05 | 0.5497525    | 0.004723096 | -3.38846 | 3.11092E-06 | 3.51129E-05 |
| Ccl19     | 6.31466525   | 2.62059E-08 | 4.921961     | 0.000101603 | -3.36438 | 0.0141607   | 0.0482988   |
| Slc45a3   | 2.11461      | 4.81229E-05 | -2.26863775  | 2.15375E-06 | -3.35837 | 1.12835E-05 | 0.00010884  |
| Itga8     | 1.831936     | 1.04544E-05 | 0.6085325    | 0.002917143 | -3.35702 | 0.00049606  | 0.0028754   |
| Pla2g2d   | 2.808317     | 0.000367764 | 2.2979585    | 0.000329662 | -3.33438 | 4.72524E-08 | 8.83436E-07 |
| Foxs1     | 2.08644175   | 1.67881E-05 | 2.5217425    | 5.78022E-06 | -3.32014 | 0.0002709   | 0.00171088  |
| Chrd1     | 5.5338415    | 7.72429E-07 | 4.98888775   | 7.96932E-07 | -3.31676 | 4.82735E-09 | 1.17892E-07 |
| Gabra3    | 4.22437675   | 0.000119562 | 4.298875     | 6.80189E-05 | -3.29195 | 0.00021403  | 0.00139946  |
| Syt12     | 1.8604285    | 1.72662E-05 | 1.99075175   | 7.22047E-06 | -3.28874 | 0.0607913   | 0.156889    |
| Akr1cl    | 3.0660785    | 2.57923E-05 | 3.34097025   | 9.88292E-05 | -3.25316 | 0.00105323  | 0.00546351  |
| Nckap5    | 1.59222875   | 2.46006E-05 | 0.813787     | 0.010015645 | -3.23837 | 0.00714405  | 0.0275095   |
| C1qtnf1   | -0.014063    | 0.462203486 | 3.17910425   | 2.96973E-06 | -3.23641 | 7.69118E-06 | 7.77329E-05 |
| Osr1      | 3.347292749  | 2.95329E-06 | 3.0997665    | 8.37396E-05 | -3.23271 | 6.29994E-08 | 1.13684E-06 |
| Arhgap6   | 2.375876     | 2.33459E-06 | 2.24222925   | 3.52531E-06 | -3.22418 | 0.00195568  | 0.00924196  |
| Adams2    | 3.148113     | 6.36833E-08 | 3.223011     | 4.06929E-08 | -3.21986 | 2.75099E-09 | 7.15222E-08 |
| Frzb      | 1.70073275   | 0.007231727 | 1.69771975   | 0.005934443 | -3.21903 | 0.000569163 | 0.00323405  |
| Gpr64     | 3.0158795    | 0.000227437 | 3.03515025   | 0.000179657 | -3.20949 | 0.00728622  | 0.0279686   |
| Slit3     | 4.05080175   | 9.15373E-08 | 4.04194625   | 2.76348E-07 | -3.18291 | 6.66298E-11 | 2.65307E-09 |
| Spic      | 3.56777425   | 2.33982E-06 | 2.792626     | 3.70727E-05 | -3.17194 | 7.01939E-06 | 7.17123E-05 |
| Glt8d2    | 2.75468225   | 1.40763E-06 | 2.59620675   | 4.96069E-06 | -3.15647 | 0.459091    | 0.673452    |
| Tiam2     | 1.79055175   | 1.45767E-06 | 0.465444     | 0.006622183 | -3.13042 | 0.0298132   | 0.0898484   |
| Pcolce2   | 4.42659075   | 0.000103195 | 4.35115825   | 8.42212E-05 | -3.11701 | 1.67744E-05 | 0.000153997 |
| Daam2     | 1.5247725    | 1.30464E-06 | 1.923589     | 2.7417E-07  | -3.11547 | 0.00525229  | 0.0212823   |
| Nav3      | 0.5548235    | 0.012280654 | 1.7713435    | 0.00006656  | -3.11537 | 0.000961301 | 0.00506007  |
| Serpina10 | 4.249114     | 9.68088E-05 | 4.15835725   | 3.08825E-05 | -3.10957 | 5.95983E-08 | 1.08159E-06 |
| Adams3    | 2.56897425   | 3.81976E-05 | 2.558071     | 1.64514E-05 | -3.10694 | 0.000416106 | 0.0024742   |
| Twist1    | 1.983587     | 2.73467E-06 | 2.302211     | 1.10838E-06 | -3.09285 | 0.00122794  | 0.00624328  |
| Al429214  | 1.790998     | 6.17627E-05 | 1.545035     | 1.07099E-05 | -3.08891 | 0.00175549  | 0.00842747  |
| Epha3     | 3.67248375   | 7.37153E-05 | 3.758342     | 3.54575E-05 | -3.07064 | 7.86686E-06 | 7.92958E-05 |
| Scara3    | 4.833925     | 1.97172E-09 | 4.06851175   | 5.30692E-05 | -3.06288 | 3.65125E-10 | 1.20742E-08 |
| Tmem119   | 2.07523125   | 4.28282E-05 | 2.015285     | 0.000135748 | -3.05683 | 2.17298E-05 | 0.000192459 |
| Vash2     | 2.08945575   | 3.26739E-05 | 0.91908075   | 0.002343552 | -3.05101 | 0.0035651   | 0.0153725   |
| Al607873  | 0.6722365    | 0.036854166 | 2.32211575   | 0.000178617 | -3.04754 | 1.9713E-10  | 6.94527E-09 |
| Hpse      | 5.25132675   | 5.23569E-10 | 2.31617025   | 0.003349496 | -3.0409  | 4.92127E-10 | 1.5614E-08  |
| Smad6     | -0.01007075  | 0.479058247 | 1.61346175   | 0.000167457 | -3.03042 | 0.000453296 | 0.002661    |
| Il1r2     | 2.118013     | 0.001949363 | 2.14724275   | 0.002117753 | -3.02512 | 0.000037097 | 0.000305711 |
| Arsi      | 2.401316     | 0.000247579 | 2.4421215    | 9.45146E-05 | -3.01827 | 0.0151937   | 0.0512988   |
| Kcne4     | 4.840268     | 1.01924E-08 | 5.39005175   | 0.000001264 | -3.0106  | 2.84672E-08 | 5.62132E-07 |
| Cxcl13    | 6.07428575   | 1.05882E-05 | 5.32042325   | 0.000158723 | -2.97303 | 3.01456E-05 | 0.000255274 |
| Mei4      | 2.87210325   | 6.31536E-08 | 2.80684075   | 1.41919E-07 | -2.96707 | 0.00468605  | 0.0193143   |
| Mfap2     | 2.48788975   | 3.38363E-05 | 1.05548075   | 0.002121235 | -2.96088 | 5.78853E-05 | 0.000448838 |
| Tnfrap6   | 5.84717575   | 2.83943E-06 | 5.13861675   | 6.88754E-06 | -2.96059 | 9.77118E-07 | 1.25875E-05 |
| Ptgir     | 3.21593175   | 2.25543E-06 | 3.00985225   | 3.3948E-08  | -2.95605 | 2.52281E-08 | 5.0539E-07  |
| Csf2rb    | 0.751355     | 2.70769E-06 | 2.82981875   | 0.000194251 | -2.93709 | 1.49256E-06 | 1.83497E-05 |
| Rcn3      | 4.42203375   | 2.55789E-08 | 1.044605     | 0.000256046 | -2.91832 | 9.83067E-10 | 2.87286E-08 |
| Fam26e    | 3.053677     | 8.30642E-05 | 3.311848     | 5.03845E-06 | -2.91364 | 0.000208706 | 0.0013694   |
| Arsj      | 1.71120825   | 4.39875E-05 | 1.5367505    | 7.01617E-05 | -2.91029 | 0.00537814  | 0.0216904   |
| Fkbp14    | 1.708814     | 8.66395E-06 | 1.26991575   | 5.60246E-05 | -2.90278 | 0.000570374 | 0.00324048  |
| Lox3      | 2.30181525   | 2.24092E-05 | 0.97400275   | 0.000368465 | -2.89064 | 0.000465808 | 0.00272274  |
| Fam171b   | 1.935963     | 0.00048209  | 0.7887435    | 0.017864593 | -2.88346 | 0.00432761  | 0.0180814   |
| Mmp9      | 3.30349075   | 9.57367E-05 | -0.815507001 | 0.022952583 | -2.88111 | 2.26982E-08 | 4.60044E-07 |
| Glis3     | 1.6355375    | 4.38438E-05 | -1.314475748 | 0.000350386 | -2.87994 | 0.00188124  | 0.00894523  |
| Atoh8     | 0.645155     | 0.007492265 | 1.998114     | 2.83229E-05 | -2.87616 | 0.00193301  | 0.00914958  |
| Pla2g15   | 2.43854025   | 7.68055E-07 | 2.084937     | 2.34684E-06 | -2.86184 | 7.74589E-10 | 2.32086E-08 |
| Sat2      | 1.861344     | 2.03955E-05 | 1.37932575   | 2.69513E-05 | -2.85262 | 0.0309349   | 0.0917209   |
| Mapk8ip1  | 1.93252775   | 0.000254659 | 1.40417975   | 0.000193716 | -2.84614 | 0.00403448  | 0.0170525   |
| Far2      | 2.30867025   | 0.000045787 | 2.06799675   | 5.86456E-07 | -2.84438 | 0.263205    | 0.470166    |
| Rspo1     | 1.60504125   | 0.000819303 | 1.72353425   | 0.00114809  | -2.81926 | 0.000216359 | 0.00141297  |
| Tmem53    | 1.78727425   | 8.85003E-06 | 1.31825475   | 9.48154E-05 | -2.81411 | 0.000897656 | 0.00476864  |
| Sult5a1   | 1.539596     | 5.98472E-05 | 1.83953475   | 4.17859E-05 | -2.80905 | 0.00188433  | 0.00895683  |
| Coro2b    | -0.165522499 | 0.139882723 | 1.687568     | 5.34438E-06 | -2.7949  | 0.00907725  | 0.0335187   |
| Nsg1      | 1.8037065    | 2.75082E-06 | -0.289018    | 0.146155575 | -2.77494 | 9.96899E-06 | 9.74986E-05 |
| Pi15      | 5.774578     | 5.02183E-06 | 5.683747     | 4.00966E-06 | -2.7708  | 2.97841E-06 | 3.38938E-05 |
| Leprel2   | 2.68149575   | 2.57891E-05 | 1.1405565    | 0.000358421 | -2.75563 | 1.23449E-07 | 2.05178E-06 |
| Twist2    | 2.6487425    | 3.43763E-07 | 2.96476775   | 2.20713E-07 | -2.745   | 0.00965011  | 0.0352437   |
| Aldh3a1   | 2.81084      | 8.03447E-05 | 2.858555     | 2.00988E-05 | -2.74165 | 0.000619225 | 0.00346657  |
| Hoxc5     | 1.6415405    | 8.84528E-06 | 1.85490475   | 1.02121E-05 | -2.73639 | 0.0416048   | 0.116172    |
| Ecm2      | 1.63488775   | 0.000374186 | 0.98728575   | 0.003857397 | -2.73245 | 0.00214243  | 0.00996773  |
| Rsph9     | 1.725827     | 0.000220582 | 1.66674225   | 0.000142161 | -2.73127 | 0.00399471  | 0.0169171   |
| Mmp23     | 4.06079525   | 4.04348E-07 | 3.85956175   | 1.24273E-07 | -2.72602 | 7.13441E-08 | 1.27029E-06 |
| Lrrc17    | 4.5034695    | 1.04333E-06 | 4.66556475   | 2.76232E-06 | -2.71355 | 0.000136589 | 0.000946855 |
| Adra2a    | 1.64845125   | 0.004164247 | 1.6960925    | 0.003284775 | -2.71126 | 0.000567953 | 0.00322776  |
| Ly6k      | 1.48200425   | 0.000627248 | 1.6989105    | 0.000557532 | -2.70096 | 2.10656E-06 | 2.49727E-05 |
| Sfrp2     | 5.20796775   | 6.03731E-08 | 5.14191275   | 2.46189E-08 | -2.68486 | 8.61523E-06 | 8.57141E-05 |
| Btc       | 2.06547675   | 0.000201802 | 2.00679375   | 0.000362268 | -2.67553 | 0.00872234  | 0.0324044   |
| Thbs3     | 2.66649475   | 1.29079E-05 | 2.442121     | 6.34768E-06 | -2.67247 | 0.000618081 | 0.00346219  |
| Fbn2      | 2.50691225   | 2.98767E-08 | 2.69667925   | 2.82776E-08 | -2.66851 | 0.0107221   | 0.0383972   |
| Figf      | 3.87949525   | 1.12852E-07 | 4.0122395    | 8.17931E-08 | -2.60911 | 0.000452001 | 0.00265565  |
| Efemp2    | 3.507792249  | 7.16555E-08 | 1.959329     | 1.18371E-05 | -2.60518 | 3.32153E-07 | 4.86016E-06 |
| Kirrel3   | 1.77710925   | 8.72516E-05 | 2.87574825   | 6.51209E-05 | -2.55947 | 0.00473978  | 0.0195027   |
| Steap3    | 2.1356245    | 6.20487E-05 | 2.31760025   | 7.6787E-06  | -2.55928 | 3.50085E-05 | 0.000290346 |
| Wnt5a     | 4.198213     | 5.89765E-06 | 4.0390955    | 1.09563E-05 | -2.52912 | 0.0456357   | 0.124921    |
| Vit       | 2.82897575   | 7.66019E-06 | 2.98957075   | 4.78277E-06 | -2.5223  | 0.00813958  | 0.0305957   |
| Trpc1     | 2.302376     | 0.000144547 | 2.049509     | 0.000566494 | -2.48206 | 0.0134119   | 0.0461431   |
| SrpX      | 5.27690525   | 3.2383E-09  | 5.71606625   | 1.3638E-09  | -2.46208 | 1.41465E-07 | 2.31618E-06 |

|          |              |              |              |             |            |             |             |
|----------|--------------|--------------|--------------|-------------|------------|-------------|-------------|
| Slamf8   | 2.18943875   | 3.28582E-06  | 4.4915455    | 4.49263E-08 | -2.4554    | 3.50586E-06 | 3.89344E-05 |
| Fgf7     | 4.5150615    | 0.000166566  | 4.675599     | 0.000135148 | -2.41966   | 0.000458553 | 0.00268577  |
| Sfrp4    | 2.815503     | 2.37901E-05  | 2.69992725   | 0.000163407 | -2.41375   | 0.000161155 | 0.00109599  |
| Kcnd1    | 1.2356575    | 2.61376E-05  | 1.58920625   | 7.76472E-07 | -2.40928   | 0.036706    | 0.105039    |
| Eno2     | 2.27431125   | 5.04791E-05  | 2.2039905    | 1.36033E-09 | -2.38537   | 0.0025367   | 0.0115077   |
| Niacr1   | 2.0587455    | 3.52686E-06  | 2.06164975   | 5.66807E-06 | -2.35278   | 6.95803E-07 | 9.2986E-06  |
| Bmper    | 1.61324675   | 0.001007848  | 2.10912175   | 0.000403617 | -2.34113   | 0.000147441 | 0.00101126  |
| Chl1     | 2.644633     | 2.18233E-06  | 2.62839      | 1.11071E-06 | -2.33143   | 1.25947E-05 | 0.000119981 |
| Gpr124   | 1.7949335    | 1.27613E-06  | -0.29578725  | 0.009424405 | -2.26208   | 0.00166107  | 0.00804594  |
| Olfml2b  | 3.534448     | 9.70383E-07  | 4.14247675   | 7.74862E-06 | -2.25557   | 3.28717E-05 | 0.000274935 |
| Adam12   | 3.16671325   | 1.83659E-06  | 2.167324     | 3.20071E-05 | -2.24375   | 2.21644E-05 | 0.000195681 |
| Rgs17    | 2.3857765    | 0.000245672  | 2.4386695    | 0.000289571 | -2.22252   | 0.326006    | 1           |
| Gpr88    | 2.85013925   | 3.38897E-08  | 2.7403465    | 8.59648E-06 | -2.22078   | 9.09898E-05 | 0.000663939 |
| Wdr35    | 2.82048675   | 8.91548E-08  | 2.16494025   | 9.33109E-06 | -2.20718   | 0.000368237 | 0.002232304 |
| Eya2     | 2.5259915    | 8.21612E-06  | 2.67755825   | 1.5918E-06  | -2.16495   | 0.00026389  | 0.00167222  |
| Has1     | 1.65624125   | 0.00020777   | 1.8293655    | 0.000205867 | -2.16196   | 0.0113966   | 0.0403616   |
| Nqo1     | 1.8437775    | 0.000108288  | -0.7176745   | 0.008335199 | -2.14787   | 0.0115671   | 0.0408434   |
| Syt13    | 1.99998175   | 1.37195E-07  | 2.301432     | 6.09237E-07 | -2.10142   | 0.00165369  | 0.00801769  |
| Il1rl2   | 4.17692025   | 1.49334E-05  | 4.9447555    | 1.70297E-06 | -2.06909   | 5.40555E-05 | 0.000423738 |
| Tmem45a  | 3.21737425   | 0.000204396  | 2.9902105    | 3.15948E-05 | -1.99222   | 0.029637    | 0.0885183   |
| Xpnp2    | 2.26148725   | 1.18594E-05  | 2.329059     | 0.000125441 | -1.96538   | 0.0230133   | 0.0721216   |
| Dse      | 4.03064025   | 6.60881E-05  | 1.46983525   | 0.000618074 | -1.94985   | 9.99565E-06 | 9.77363E-05 |
| Gm11128  | 2.34419975   | 0.000596236  | 2.48387625   | 0.000339533 | -1.91552   | 0.23391     | 1           |
| Timd4    | 3.010533     | 2.42663E-06  | 2.346013     | 8.98663E-06 | -1.8995    | 0.00771099  | 0.0292793   |
| Leprel1  | 1.17541775   | 0.000100757  | 3.328006499  | 6.69416E-06 | -1.88334   | 0.00574787  | 0.022934    |
| Spon2    | 2.4829125    | 5.63817E-07  | 2.6236025    | 7.11825E-07 | -1.7906    | 0.0106537   | 0.0382069   |
| Grik5    | 1.70011125   | 0.000089661  | 1.03469375   | 0.002411399 | -1.78225   | 0.0431873   | 0.119656    |
| Icosl    | 3.04766375   | 2.11006E-05  | 2.97178925   | 4.15512E-05 | -1.76922   | 0.00025089  | 0.00160183  |
| Gpx7     | 1.251042     | 3.15121E-05  | 1.62595375   | 8.22756E-06 | -1.76611   | 0.00828365  | 0.0310612   |
| Mrgprf   | 2.48062725   | 3.09223E-07  | 2.53637275   | 8.55437E-05 | -1.70089   | 0.3811      | 1           |
| Loxl2    | 2.6542945    | 6.00642E-05  | -0.683471249 | 0.008248212 | -1.69674   | 0.00473802  | 0.0194975   |
| Scg3     | 3.7736975    | 0.000254055  | 4.3782565    | 6.46338E-05 | -1.6095    | 0.493144    | 0.70175     |
| Cd248    | 1.63530275   | 0.000320849  | 1.9264745    | 0.000746745 | -1.59701   | 0.00203987  | 0.00957001  |
| Il6      | 1.93292475   | 0.000789963  | 4.163473     | 4.78693E-05 | -1.54696   | 0.0119263   | 0.0419112   |
| Vcan     | 1.34441925   | 0.000183003  | 1.824867     | 2.92421E-05 | -1.53294   | 0.0467617   | 0.127247    |
| Tpbp     | 1.70051675   | 6.59994E-05  | 1.7300505    | 7.97445E-05 | -1.49592   | 0.0171714   | 0.0567697   |
| Ripply3  | -0.102163001 | 0.128848465  | 0.235849     | 9.52194E-05 | -1.41042   | 0.0403171   | 0.113255    |
| Pygm     | 2.128031     | 8.36233E-06  | 2.702329     | 5.05482E-06 | -1.25735   | 0.129074    | 0.279355    |
| Ccl7     | 5.75890475   | 1.0453E-06   | 4.19478075   | 5.76788E-07 | -1.23413   | 0.0180877   | 0.0592045   |
| Phkg1    | 2.084106     | 3.56918E-05  | 2.08713775   | 5.36531E-06 | -1.21612   | 0.148941    | 0.311487    |
| Sfmbt2   | 1.745151     | 0.000162831  | 0.17237775   | 0.175585423 | -1.20247   | 0.408504    | 0.628239    |
| Dzip1    | 2.81496675   | 6.75213E-05  | 2.8747295    | 7.18133E-05 | -1.19011   | 0.0635025   | 0.16234     |
| Spry2    | 1.86696925   | 9.83518E-07  | 1.8979115    | 8.77169E-07 | -1.18142   | 0.0669423   | 0.169245    |
| Ccl2     | 5.053932     | 7.76295E-06  | 3.5348185    | 1.42823E-05 | -1.1784    | 0.0215149   | 0.0683139   |
| Arhgap10 | 1.72767325   | 3.29342E-05  | 2.59776275   | 5.62528E-06 | -1.17258   | 0.0487898   | 0.131437    |
| Sostdc1  | 4.037506     | 3.58029E-07  | 4.05029325   | 6.80997E-07 | -1.1105    | 0.00167703  | 0.0556567   |
| Cyp2c44  | 1.81439975   | 0.000883866  | 2.09032975   | 0.000902302 | -1.07806   | 0.593342    | 1           |
| Ephb6    | 2.68273475   | 0.000171213  | 2.5702165    | 2.17501E-05 | -1.04898   | 0.0276089   | 0.0835255   |
| Chpf     | 1.8882905    | 1.07185E-06  | 2.0461285    | 5.89038E-07 | -0.911664  | 0.0222142   | 0.070057    |
| Cdon     | 3.438021     | 2.01791E-06  | 2.8227585    | 4.55007E-06 | -0.859206  | 0.184985    | 0.366558    |
| Has2     | 3.723334749  | 0.000188048  | 3.3408715    | 0.000157063 | -0.807563  | 0.317251    | 0.532987    |
| Usp11    | 1.72622975   | 4.43141E-06  | 1.118381     | 0.000223782 | -0.806422  | 0.0726484   | 0.180189    |
| Adamts10 | 1.7068575    | 0.00026207   | 1.5249015    | 8.79603E-05 | -0.764601  | 0.0628282   | 0.160934    |
| Cxcl10   | 1.69512225   | 9.05996E-07  | 0.7510175    | 0.000117008 | -0.650612  | 0.123195    | 0.270142    |
| Cd80     | 1.61504075   | 0.000101426  | 1.58034575   | 8.22447E-08 | -0.624978  | 0.388899    | 0.609688    |
| Gstm4    | 2.23682275   | 7.7836E-06   | 1.65626475   | 5.58311E-05 | -0.526706  | 0.467134    | 0.680384    |
| Gpc3     | 4.13945225   | 0.000242509  | 4.176529     | 0.000145248 | -0.517339  | 0.366464    | 0.586535    |
| Cercam   | 1.72906      | 3.14476E-07  | 1.41232      | 2.89138E-06 | -0.481333  | 0.41299     | 0.632464    |
| Ncald    | 2.00474075   | 1.09948E-06  | 1.783222     | 9.83644E-07 | -0.408437  | 0.421073    | 0.640373    |
| Mboat1   | 1.2171895    | 0.000155193  | 1.6702345    | 1.98927E-05 | -0.396327  | 0.418041    | 0.637398    |
| H2-Ob    | 0.708601     | 0.004210888  | 2.135271     | 1.99502E-05 | -0.372153  | 0.721113    | 0.866816    |
| Aif1     | 1.74698275   | 0.00013342   | 0.95994925   | 0.000492559 | -0.348979  | 0.66032     | 0.828507    |
| Ccl15a3  | 2.44598225   | 4.43687E-06  | 3.52302925   | 6.48595E-07 | -0.24279   | 0.60629     | 0.790142    |
| Limk1    | 1.65885625   | 0.000101843  | 1.2357695    | 0.000391762 | -0.165547  | 0.757016    | 0.887956    |
| Wfdc1    | 1.81659575   | 0.000010913  | 2.20300325   | 3.35567E-05 | -0.149601  | 0.906145    | 0.944997    |
| Clec11a  | 2.69832925   | 5.81975E-07  | 2.70926725   | 3.47276E-06 | -0.134048  | 0.862644    | 0.944728    |
| Arc      | -0.391367    | 0.088556225  | 1.887285     | 4.56915E-06 | -0.0692921 | 0.940615    | 0.980278    |
| Tnfrsf11 | 1.5432115    | 0.000918732  | 1.81286225   | 0.000161116 | 0.0938916  | 0.823418    | 0.9243      |
| Gli1     | 1.5916675    | 4.39338E-06  | 1.61324125   | 1.51605E-06 | 0.17306    | 0.962846    | 1           |
| Apbb1ip  | 2.063814     | 1.56966E-05  | 2.18207075   | 4.94823E-06 | 0.282524   | 0.519474    | 0.724548    |
| Tnfrsf1b | 0.380856251  | 0.03135234   | 2.164838     | 6.04638E-05 | 0.354431   | 0.411113    | 0.630871    |
| Cxcl5    | 2.97378375   | 0.000089246  | 3.01998875   | 0.000120681 | 0.385455   | 0.509522    | 0.715577    |
| Brsk1    | 1.62431      | 1.30967E-07  | 1.41375825   | 2.02819E-07 | 0.460147   | 0.863785    | 1           |
| Cd72     | 3.537611499  | 3.06305E-07  | 3.7026915    | 1.14361E-06 | 0.528591   | 0.324659    | 0.541235    |
| Abcb1b   | 1.81367225   | 0.000247083  | 2.90382425   | 1.86467E-08 | 0.533219   | 0.181165    | 0.361041    |
| Lif      | 3.467224     | 0.00007976   | 1.9115925    | 0.000847414 | 0.603026   | 0.260882    | 0.467472    |
| Fit3l    | 3.3064265    | 1.29876E-06  | 2.742603     | 6.54035E-07 | 0.663704   | 0.261771    | 0.468641    |
| Ikake    | 1.9973165    | 5.13923E-05  | 0.4772235    | 0.002848309 | 0.756747   | 0.0456249   | 0.124899    |
| Pipox    | 1.53151575   | 0.000306688  | 1.6584045    | 4.70712E-05 | 0.785226   | 0.431198    | 0.649578    |
| Slc9a9   | 1.9706655    | 5.56355E-06  | -3.494487748 | 1.57059E-07 | 0.811116   | 0.128537    | 0.27857     |
| Syt11    | 1.81590125   | 2.79764E-05  | 2.443987     | 6.87921E-07 | 0.927649   | 0.0433411   | 0.120013    |
| Adora2a  | 2.35543125   | 1.22006E-05  | 3.009279     | 8.78466E-06 | 1.08543    | 0.0066705   | 0.0260084   |
| Tnfrsf8  | 3.210607     | 1.5546E-06   | 2.925725     | 1.83451E-05 | 1.16233    | 0.0030308   | 0.0133718   |
| Rrad     | 1.20798875   | 8.36615E-05  | 2.080353     | 1.04655E-06 | 1.19808    | 0.00576848  | 0.0230073   |
| Tnfrsf9  | 1.90833925   | 1.18727E-05  | 2.2074       | 6.1427E-06  | 1.47981    | 0.00126382  | 0.00639602  |
| Fhl2     | 2.13357      | 0.0001173919 | 2.439898     | 0.000231848 | 2.08012    | 0.00273452  | 0.0122576   |
| Lag3     | 2.9729735    | 4.896E-07    | 3.15399725   | 4.97845E-08 | 2.29349    | 0.00143965  | 0.0071317   |
| Dusp10   | 2.42601175   | 0.000183515  | 1.77649225   | 6.16172E-05 | 2.34506    | 0.000207936 | 0.00136543  |

|          |            |             |            |             |                                                         |  |  |
|----------|------------|-------------|------------|-------------|---------------------------------------------------------|--|--|
| Tmem132c | 2.19570975 | 0.000342903 | 1.35493325 | 0.001449526 | low expression values                                   |  |  |
| Cubn     | 1.7846295  | 0.000161371 | 1.810778   | 2.89803E-05 | low expression values/not enough alignments for testing |  |  |
| Sico1c1  | 2.518989   | 0.000235017 | 2.71584575 | 0.000061462 | low expression values/not enough alignments for testing |  |  |
| Agtr2    | 3.8837835  | 0.000114122 | 3.992054   | 1.51814E-05 | low expression values/not enough alignments for testing |  |  |
| Ugt3a1   | 2.12820975 | 8.14208E-05 | 2.09151475 | 7.73954E-05 | low expression values/not enough alignments for testing |  |  |
| Gm1987   | 6.27245175 | 4.42788E-09 | 4.9260205  | 0.000107076 | test status fail                                        |  |  |
| Ccl21a   | 0.414585   | 0.004135942 | 3.27120975 | 0.00080401  | too many fragments in locus                             |  |  |
